# Supplementary material for: TNFSF14/LIGHT, a Non-Canonical NF-kB Stimulus, Induces the HIF Pathway
Source: Preprints.org preprint supplement (doi:10.20944/preprints201807.0007.v1), 2018-07-02

## **Supplementary Figure Legends-D'Ignazio et al.**

**Sup. Figure S1A. Validation of p52 siRNA-mediated knockdown.** A) HeLa cells were transfected with siRNA control and p52 oligonucleotides and treated with 100 ng/mL LIGHT for the 0, 4, and 24 hours prior mRNA extraction. RT-qPCR analysis for p52 (NFKB2) gene transcript was performed, normalising to Actin mRNA levels. All the values were normalised to the control treated with LIGHT for 4 hours. The graph shows mean and SEM determined from at least three independent experiments. Student t-test analysis was performed and significance determined as follows: \*\*  $p \leq 0.01$ , \*\*\*  $p \leq 0.001$

**Sup. Figure S2. Validation of NF- $\kappa$ B subunit, p52, ChIP specificity at the HIF-2 $\alpha$  promoter.** A) HeLa cells were transfected with siRNA control and p52 oligonucleotides for 72 hours prior to cross-linking and lysis. Chromatin immunoprecipitations (ChIPs) were performed for the levels of p52 present at the indicated putative  $\kappa$ B site on the HIF-2 $\alpha$  promoter. Rabbit IgG was used as antibody control. The graph depicts mean and SEM of a minimum of three independent experiments. Student t test was performed and significance determined as follows: ns = not significant.

Figure S1

A

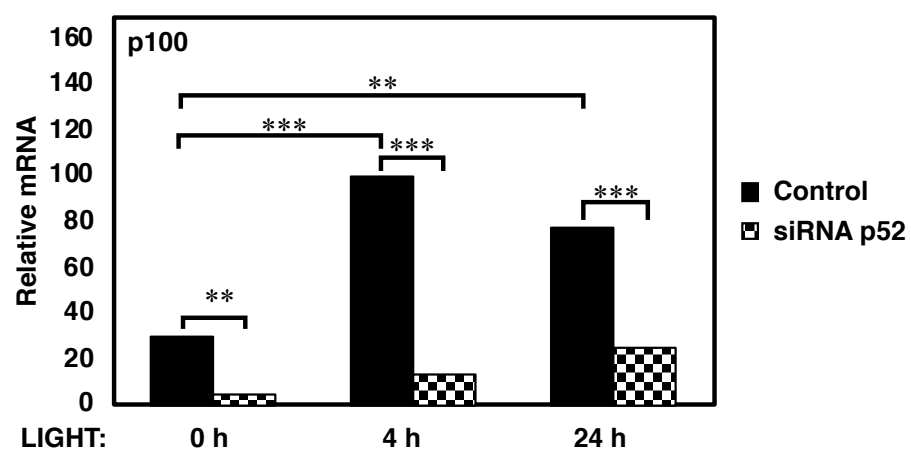

**Figure S2**

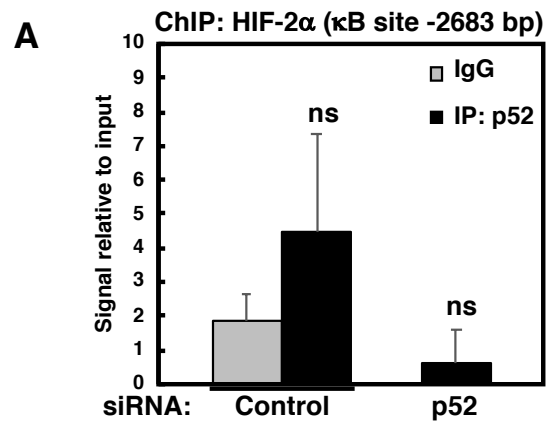

Supplement: Supplementary file 1 [file supplementary]
